1  
2  
3  
4  
5 **Sex and Estrous Cycle in Memory for Sequences of Events in Rats**

6 Abbreviated Title: SEX AND ESTROUS IN SEQUENCE MEMORY

7  
8 M. Jayachandran<sup>1</sup>, P. Langius<sup>1</sup>, F. Pazos Rego<sup>1</sup>, R. P. Vertes<sup>2</sup>, T. A. Allen<sup>1,2,3</sup>

9  
10 <sup>1</sup>Cognitive Neuroscience Program, Florida International University, Miami FL, 33199

11 Correspondence: [tallen@fiu.edu](mailto:tallen@fiu.edu)

12 <sup>2</sup>Center for Complex Systems and Brain Sciences, Florida Atlantic University, Boca Raton, FL 33431, USA

13 <sup>3</sup>Department of Environmental Health Sciences, Robert Stempel College of Public Health, Florida International  
14 University, Miami, FL 33199, USA

15  
16  
17  
18  
19 Key words: sequence memory, episodic memory, temporal context, sex hormones, learning and memory

20  
21  
22  
23 Number of Figures: 5  
24 Number of tables: 0  
25 Number of Text Pages: 31  
26 Title: 15  
27 Abstract: 248  
28 Introduction: 784  
29 Methods: 1622  
30 Results: 2931  
31 Discussion: 1233  
32 Acknowledgement: 59  
33 Author Contributions: 38  
34 Figure Captions: 864  
35 Total: 7780

36  
37 Corresponding Author:

38 Timothy A. Allen, PhD  
39 Department of Psychology  
40 Florida International University  
41 11200 SW 8<sup>th</sup> Street  
42 Miami, FL 33199  
43 email: [tallen@fiu.edu](mailto:tallen@fiu.edu)  
44  
45

**ABSTRACT**

The ability to remember sequences of events is fundamental to episodic memory. While rodent studies have examined sex and estrous cycle in episodic-like spatial memory tasks, little is known about these biological variables in memory for sequences of events that depend on representations of temporal context. We investigated the role of sex and estrous cycle in rats during all training and testing stages of a cross-species validated sequence memory task (Jayachandran et al., 2019). Rats were trained on a task composed of two sequences, each with four unique odors delivered on opposite ends of a linear track. Training occurred in six successive stages starting with learning to poke in a nose port for  $\geq 1.2$ s; eventually demonstrating sequence memory by holding their nose in the port for  $\geq 1$ s for in-sequence odors and  $< 1$ s for out-of-sequence odors in order to receive a water reward. Performance was analyzed across sex and estrous cycle (proestrus, estrus, metestrus, and diestrus), the latter being determined by the cellular composition of a daily vaginal lavage. We found no evidence of sex differences in asymptotic sequence memory performance, similar to published data in humans performing the analogous task (Reeders et al., 2021). Likewise, we found no differences in performance across the estrous cycle. One minor difference was that female rats tended to have slightly longer poke times, while males had slightly more short poke times but this did not affect their decisions. These results suggest sex and estrous cycle are not major factors in sequence memory capacities.

**Word Count: 249 (max: 250)**

## INTRODUCTION

Episodic memory is the ability to encode and recollect our daily personal experiences (Tulving, 2002; Allen & Fortin, 2013). A fundamental feature of episodic memory is the ability to remember sequences of events as they occurred across time (Allen et al., 2020; Allen et al., 2014, 2016; Eichenbaum & Fortin, 2005; Jayachandran et al., 2019). While rodent studies have examined sex and estrous cycle as variables in spatial and episodic-like memory tasks, little is known about these biological variables in a sequence memory task that depends on representations of temporal contexts. The study of sex and sex hormones in sequence memory is particularly important in understanding the neurobiology of mental health disorders because of known sex differences and the prevalence of deficits in temporal cognition (Li & Singh, 2014; Postma et al., 2004; Valera et al., 2010) in disorders such as schizophrenia and Alzheimer's disease (Kessler et al., 2005; Launer, 1999; Pigott, 2003).

Sex differences in memory have been widely reported in human and nonhuman animals alike (Levy et al., 2005; Seymoure et al., 1996; Williams et al., 1990). For example, rodent studies have shown that sex impacts both spatial cognition and object recognition (Barha et al., 2010; Hamson et al., 2016; Koss & Frick, 2017; Luine et al., 2017; Spritzer et al., 2008). Most commonly, evidence suggests that human and rodent males have an advantage in tests of spatial memory (Driscoll, 2005; Jonasson, 2005; Nowak et al., 2014; Steimer & Woolley et al., 2010). Importantly, when strategy is considered or a landmark, such as a wall cue is included, these sex differences disappear (Chai & Jacobs, 2010; Saucier et al., 2008). Alternatively, females tend to outperform males in object memory (Bettis & Jacobs, 2012; Levy et al., 2005; Sutcliffe et al., 2007). However, not every study finds sex differences in spatial learning and memory tasks (Bucci et al., 2021; Frick et al., 1999; Healy et al., 1999).

When looking at sex differences in memory, it is important to consider the bioavailability of key sex hormones. For example, exogenous ovarian hormones have been shown to enhance performance in object memory in both rodent and human females (Walf & Frye, 2006). This suggests the sex differences in memory can be dependent on the levels of circulating gonadal hormones. Important to our experiments here, hormone levels change reliably during the estrous cycle in females and different phases have been linked to differences in memory. For example, Healy and colleagues, (1999) showed that female rodents

00 were slowest to locate the platform in a Morris water maze task during estrus and were fastest during  
01 proestrus which was attributed to a core spatial memory difference. Likewise, in other spatial tasks, females  
02 demonstrate the use of allocentric strategies during proestrus and egocentric/mixed strategies during  
03 diestrus (Korol, 2004; Koss & Frick, 2017). In object memory tasks, rats in proestrus outperformed rats in  
04 diestrus or metestrus (Koss & Frick, 2017; Van Goethem et al., 2012). By contrast to these aforementioned  
05 studies not all studies find differences in memory across the estrous cycle. For example, Stackman et al.,  
06 (1997) did not observe significant differences in acquisition or performance levels across the estrous cycle  
07 when testing working memory using a radial arm maze; however, they showed that rats performed the task  
08 significantly slower during proestrus than on any other estrous cycle phase. This suggests that while the  
09 underlying working memory process remained stable, other aspects of performance can vary across the  
10 estrous cycle.

11 Here, we investigated the role of sex and estrous cycle (proestrus, estrus, metestrus, diestrus) in rats  
12 during training and testing stage of an odor sequence memory task (Jayachandran et al., 2019). Rats were  
13 trained for several months on the sequence memory task composed of two four-odor sequences delivered  
14 at opposite ends of a linear track. Training occurred progressively across six major stages starting with  
15 learning to poke and hold for  $\geq 1.2$ s for a small water reward to eventually differentiating in-sequence (InSeq)  
16 and out-of-sequence (OutSeq) odors, one at a time, in four odor sequence sets. Performance across  
17 training stages was analyzed across sex and estrous cycle phases, the latter of which was determined by  
18 the cellular composition of a vaginal lavage. We conducted an extensive analysis of behavior at each stage  
19 including trials to criterion, self-paced inter-odor interval times, self-paced inter-sequence interval times,  
20 poke times under different sequential and accuracy conditions, and overall sequence memory. We found no  
21 evidence that males and females differed in learning, remembering, or performing the sequence memory  
22 task. Moreover, we did not find any differences across the estrous cycle in sequence memory. The results  
23 suggest sex and estrous cycle are not major factors in memory for sequences of events.

24

25

## METHODS

26 **Subjects:** Twenty Long-Evans rats (10 females; Charles River Laboratories; weighing 250-350g upon  
27 arrival) were used. Two male rats failed to progress past the TwoOdor stage of training and were excluded  
28 from all analysis. Rats were individually housed and maintained on a 12-hr inverse light/dark cycle (lights  
29 were turned off at 10 AM). Rats had *ad libitum* access to food, but access to water was limited to 3 - 5min  
30 each day, depending on how much water they received as a reward during behavioral training (6 - 9mL). All  
31 training sessions and lavages were conducted during the dark phase (active period) of the light cycle. All  
32 experimental procedures using animals were conducted in accordance with the Florida International  
33 University Institutional Animal Care and Use Committee (FIU IACUC).

34

35 **Task Apparatus:** Rats were tested in a noise-attenuated experimental room. The behavioral apparatus  
36 consisted of a linear track (length, 183cm; width, 10cm; height, 43cm) with walls angled outward at 15° and  
37 nose ports centered at each end through which repeated deliveries of multiple distinct odors could be  
38 presented. Photobeam sensors were used to detect nose port entries. Each nose port was connected to an  
39 odor delivery system (Med Associates; Fairfax, VT). Odor deliveries were initiated by a nose-poke entry and  
40 terminated either when the rat withdrew their poke or after 1s had elapsed. Water ports were positioned  
41 under each nose port for reward delivery. Timing boards (Plexon; Dallas, TX) and digital input/output  
42 devices (National Instruments; Austin, TX) were used to measure all event times and control the hardware.  
43 All aspects of the task were automated using custom MATLAB scripts (MathWorks 2021a; Natick, MA). A  
44 256-channel OmniPlex with video tracking and CinePlex behavioral software (Plexon; Dallas, TX) were used  
45 to interface with the hardware in real time and record behavioral data. Odors were organic odorants  
46 contained in glass jars (Sigma-Aldrich; St. Louis, MO, A1: 1-octanol, CAS: 111-87-5; B1: (-) - limonene,  
47 CAS: 5989-54-8; C1: l-menthone, CAS: 14073-97-3; D1: isobutyl alcohol, CAS: 78-83-1; A2: acetophenone,  
48 CAS: 98-86-2; B2: (1S) - (-) – beta-pinene, CAS: 18172-67-3; C2: L (-) - carvone, CAS: 6485-40-1; D2: 5-  
49 methyl-2-hexanone, CAS: 110-12-3) that were volatilized with nitrogen air (flow rate, 2L/min) and diluted  
50 with ultrapure air (flow rate, 1L/min). To prevent cross-contamination, separate Teflon tubing lines were  
51 used for each odor. These lines converged into a single channel at the bottom of the odor port. In addition, a

52 vacuum located at the top of the odor port provided constant negative pressure to quickly evacuate odor  
53 traces with a matched flow rate.

54

55 **Sequence Memory Task:** The sequence memory task (Jayachandran et al., 2019; Allen et al., 2014)  
56 involves repeated presentations of odor sequences and requires the rat to determine whether each item  
57 (odor) presented is in-sequence (InSeq) or out-of-sequence (OutSeq). Rats were trained on two sequences,  
58 each comprised of four distinct odors (e.g., Seq1: A<sub>1</sub>B<sub>1</sub>C<sub>1</sub>D<sub>1</sub>, Seq2: A<sub>2</sub>B<sub>2</sub>C<sub>2</sub>D<sub>2</sub>). Each sequence was  
59 presented at either end of a linear track maze. Odor presentations were initiated by a nose-poke, and each  
60 trial was terminated after the rat either held the nose-poke response for ≥1s (InSeq) or withdrew its nose-  
61 poke response <1s (OutSeq). Trials were separated by 1s intervals. Water rewards (20μl; diluted at 1g of  
62 aspartame for every 500mL of water) were delivered below the odor port after each correct response.  
63 Incorrect responses triggered a buzzer sound and the termination of the sequence. Each sequence was  
64 presented 50-100 times per session; approximately half the presentations included all items InSeq (ABCD)  
65 and half included one item OutSeq (e.g., ABAD, odor A repeated in the 3rd position). Note that OutSeq  
66 items could be presented in any sequence position except the first position (i.e., sequences always began  
67 with an InSeq item). Sequence memory was probed with OutSeq trials (e.g., ABAD; one OutSeq trial  
68 randomly presented per sequence).

69

70 **Sequence Memory Task Training:** Naive rats were initially trained on a series of incremental stages over  
71 20-30 weeks. Each rat was trained to poke and hold its nose in an odor port to receive a small water reward.  
72 The minimum required nose-poke duration started at 50ms and was gradually increased (in 15ms  
73 increments) until the rat held the nose-poke position for ≥1.2s ~ 75% of the time over three sessions (75-100  
74 nose-pokes per session). The rats were then trained to poke on side 2 until reaching criterion; poking for  
75 ≥1.2s with ~75% accuracy for three consecutive sessions. The rats were then habituated to odor  
76 presentations in the port (odor A<sub>1</sub> and A<sub>2</sub>). The hold time was reduced down to 1 s and rats were required to  
77 alternate between sides for a small water reward at each side for ~75% accuracy for three consecutive  
78 sessions before moving on. Then a second set of odors was introduced (Seq1: A<sub>1</sub>B<sub>1</sub> and Seq2: A<sub>2</sub>B<sub>2</sub>) and

79 each rat was required to maintain its nose-poke response for  $\geq 1$ s to receive a reward and needed to  
80 achieve  $\sim 70\%$  accuracy before moving on. The rats were next trained to identify InSeq and OutSeq items.  
81 Rats began this stage trained on a two-item sequence: they were presented with “AB” and “AA”  
82 sequences. The correct response to the first odor was to hold their nose-poke for  $\geq 1$ s (Odor A always being  
83 the first item). For the second odor, rats were required to determine whether the item was InSeq (AB; hold  
84 for  $\geq 1$ s to receive reward) or OutSeq (AA; withdraw before 1s to receive a reward). After reaching criterion  
85 on the two-item sequence, the number of items per sequence was increased to three odors each side  
86 (Seq1: A<sub>1</sub>B<sub>1</sub>C<sub>1</sub> and Seq2: A<sub>2</sub>B<sub>2</sub>C<sub>2</sub>), and four odors each side (Seq1: A<sub>1</sub>B<sub>1</sub>C<sub>1</sub> D<sub>1</sub> and Seq2: A<sub>2</sub>B<sub>2</sub>C<sub>2</sub>D<sub>2</sub>) in  
87 successive stages. The criterion for these stages set percentages as indicated in the results or the ability  
88 differentiate InSeq and OutSeq items above a sequence memory index (SMI; see quantitative and statistical  
89 analysis) of 0.2 over three consecutive sessions. Once rats reached criterion for the last stage of training, 15  
90 consecutive sessions were collected to examine both sex and estrous cycle differences in overall SMI.

91

92 **Lavaging:** Phases of the estrus cycle were determined in each female rat using vaginal lavage within four  
93 hours of each behavioral session. Rats were restrained using a designated towel and a drop of sterilized  
94 saline (NaCl, 0.85%) was placed over the vaginal opening to clean the area. The tip of a sterilized transfer  
95 pipette filled with sterilized saline ( $\sim 0.25 - 0.5$ mL) was inserted into the vaginal opening to extract vaginal  
96 cells. All vaginal smears were placed on glass slides and photomicrographs were taken under brightfield  
97 illumination using an Olympus BX41 following guidelines from Westwood (2008). To control for  
98 experimenter handling, male rats were handled similarly and poked around the anal opening with a clean  
99 transfer pipette.

00

01 **Estrous Cycle Cytology:** Estrous cycles in rats typically last four to five days and have four distinct phases:  
02 proestrus, estrus, metestrus and diestrus; each phase corresponds with specific cell types, i.e., nucleated  
03 epithelial cells, amorphous cornified cells, and small round leukocytes. Proestrus is characterized  
04 predominantly by nucleated epithelial cells, estrus predominantly amorphous cornified cells, metestrus by a  
05 mixture of nucleated epithelial cells, cornified cells and leukocytes, and diestrus predominantly leukocytes.

06 All vaginal cell samples were obtained and imaged, then the images were blindly classified by three  
07 investigators.

08

### 09 **Quantification and Statistical Analysis:**

10 All data was analyzed in MATLAB 2021a (MathWorks; Natick, MA), SPSS 20.0.0, and Excel 2016 using  
11 custom scripts and functions. Performance on the task can be analyzed using a number of measures (Allen  
12 et al., 2014). The first position of each sequence was excluded from all analysis as these items are always  
13 InSeq. Expected vs. observed frequencies were analyzed with G tests to determine whether the observed  
14 frequencies of InSeq and OutSeq responses for a given session were significantly different from the  
15 frequency expected by chance. G tests provide a measure of performance that controls for response bias  
16 and is a robust alternative to the  $\chi^2$  test, especially for datasets that include cells with smaller frequencies  
17 (Sokal & Rohlf, 1995). To compare performance across sessions or animals, a SMI was calculated (Allen et  
18 al., 2014) as shown in the following equation:

$$19 \quad SMI = \frac{(0.9 * IN_{out})(0.1 * OUT_{cor}) - (0.9 * IN_{inc})(0.1 * OUT_{inc})}{\sqrt{(0.9 * IN_{cor} + 0.9 * IN_{inc})(0.1 * OUT_{cor} + 0.1 * OUT_{inc}) * (0.9 * IN_{cor} + 0.1 * OUT_{inc})(0.9 * IN_{inc} + 0.1 * OUT_{cor})}}$$

20 The SMI normalizes the proportion of InSeq and OutSeq items presented during a session and reduces  
21 sequence memory performance to a single value ranging from -1 to 1. A score of 1 represents a perfect  
22 sequence memory performance in which a subject would have correctly held their nose-poke response to all  
23 InSeq items and correctly withdrawn on all OutSeq items. A score of 0 indicates chance performance.  
24 Negative SMI scores represent performance levels below that expected by chance. SMI was calculated for  
25 males and females as well as between estrous phases during the two, three, and four odor stages of the  
26 sequence task. Using SPSS, an independent t-test was used to determine if males and females differed in  
27 their overall SMI. We went on to examine the differences between sequence 1 and sequence 2 within sex  
28 and estrous cycle by running a two-way ANOVA. A one-way ANOVA was used to determine if overall SMI  
29 differed within female estrous cycle. Linear regressions were performed in increments of pre-determined set  
30 trials or sessions to compare males and females in order to determine learning at each stage of training on  
31 the sequence task. Independent sample t-tests were used to analyze whether males and females differed in



32 self-paced inter-trial-interval (ITI), inter-odor-interval (IOI), and inter-sequence interval (ISI). Nose-poke  
33 duration was analyzed using independent t-tests to determine whether rats held their responses significantly  
34 longer in InSeq<sub>correct</sub> than in OutSeq<sub>correct</sub> trials. General poke distributions were created through MATLAB  
35 using the session data.

## 36 RESULTS

### 37 Overall Sequence Memory Task and Training

38 We trained male ( $n = 10$ ) and female ( $n = 10$ ) rats in an odor sequence memory task (Jayachandran et  
39 al., 2019). The behavioral setup was automated and allowed repeated delivery of pure chemical odorants  
40 between two odor ports located at opposite ends of a linear track (Figure 1A). The rats were trained to  
41 indicate if an odor is InSeq by holding their nose in the nose-port for  $\geq 1$ s (Figure 1Bi) or OutSeq by  
42 withdrawing their nose prior to 1 s for a small water reward (Figure 1Bii). Rats were trained in progressive  
43 stages over several months on the sequence task, as depicted in Figure 1C. At each stage of training on the  
44 sequence task, rats had to reach a specific performance criterion in order to progress to the next stage.  
45 Once they reached the final stage (FourOdors) and behavioral criterion, we collected 15 consecutive  
46 sessions to analyze overall sequence memory. Two male rats were not able to continue past TwoOdors and  
47 therefore we removed them from the overall analysis. We calculated an SMI to measure overall sequence  
48 memory while controlling for individual differences in poke-hold behavior (Allen et al., 2014). We averaged  
49 the overall number of sessions per stage of training between males (Poke&Hold<sub>Side1</sub>:  $28.125 \pm 2.601$ ;  
50 Poke&Hold<sub>Side2</sub>:  $8.625 \pm 1.731$ ; OneOdor:  $15.500 \pm 2.706$ ; TwoOdors:  $49.375 \pm 8.268$ ; ThreeOdors:  $33.500$   
51  $\pm 8.203$ ; FourOdors:  $30.625 \pm 1.499$ ) and females (Poke&Hold<sub>Side1</sub>:  $22.800 \pm 1.504$ ; Poke&Hold<sub>Side2</sub>:  $8.400 \pm$   
52  $1.962$ ; OneOdor:  $13.300 \pm 1.506$ ; TwoOdors:  $40.600 \pm 4.861$ ; ThreeOdors:  $30.800 \pm 3.782$ ; FourOdors:  
53  $30.400 \pm 0.957$ ). There were no significant differences in the number of sessions to criterion for stage when  
54 comparing males and females (Poke&Hold<sub>Side1</sub>:  $t_{(16)} = -1.861$ ,  $p = 0.081$ ; Poke&Hold<sub>Side2</sub>:  $t_{(16)} = -0.084$ ,  $p =$   
55  $0.934$ ; OneOdor:  $t_{(16)} = -0.749$ ,  $p = 0.465$ ; TwoOdors:  $t_{(16)} = -0.959$ ,  $p = 0.352$ ; ThreeOdors:  $t_{(16)} = -0.320$ ,  $p =$   
56  $0.753$ ; FourOdors;  $t_{(16)} = -0.131$ ,  $p = 0.897$ ).

### 58 Males and Females Parallel in Poking Behaviors

59 Rats were first trained to poke and hold in the nose port located on side 1 of the sequence memory task  
60 (Figure 2Ai). During this stage, the rat is trained to hold their nose in the nose port with a start hold time of  
61 50ms. With each correct trial, the hold time was increased by 15ms until reaching a 1.2s hold time. The rats  
62 were then required to poke for  $\geq 1.2$ s at  $\sim 75\%$  accuracy for 3 consecutive sessions. We first examined the  
63 learning rates of males and females by calculating the slope over 200 trial increments (Figure 2Aii). Males  
64 and females did not show any significant differences in learning during  $\text{Poke\&Hold}_{\text{side1}}$  ( $\text{Trials}_{1-200}$ :  $t_{(16)} =$   
65  $1.075$ ,  $p = 0.299$ ;  $\text{Trials}_{200-400}$ :  $t_{(16)} = 0.850$ ,  $p = 0.262$ ;  $\text{Trials}_{400-600}$ :  $t_{(16)} = 0.336$ ,  $p = 0.741$ ;  $\text{Trials}_{600-800}$ :  $t_{(16)} =$   
66  $0.840$ ,  $p = 0.413$ ;  $\text{Trials}_{800-1000}$ :  $t_{(16)} = 0.754$ ,  $p = 0.462$ ). A few rats exceeded 1000 trials to progress to the  
67 next stage of the task; however, due to too few values we could not calculate an average past 1000 trials.  
68 We then looked at the poke distributions between males and females for all trials. Overall, the proportion of  
69 nosepokes remained similar between males and females with a slight increase for males on short pokes  
70 (Figure 2Aiii). We performed several analyses to test the alternative hypothesis that non-memory-related  
71 behavioral effects account for impaired performance in the sequence task. We measured the time it took  
72 rats to initiate each poke (inter-trial-interval; ITI). The ITI did not differ significantly between males and  
73 females (Figure 2Aiv;  $t_{(410)} = -0.174$ ,  $p = 0.862$ ).

74 Once reaching criterion for  $\text{Poke\&Hold}_{\text{side1}}$  rats were then trained on  $\text{Poke\&Hold}_{\text{side2}}$  where rats were  
75 familiarized with the odor port on side 2 and trained to poke for  $\geq 1.2$ s at  $\sim 75\%$  accuracy for 3 consecutive  
76 sessions (Figure 2Bi). We calculated the proportion correct for each session after poke hold times became  
77 consistent. We examined learning between males and females by measuring proportion correct and  
78 calculating the rate of change in proportion correct (Figure 2Bii; 5 session increments). A few rats continued  
79 past 10 sessions; however we were not able to calculate an average due to the low sample sizes after this  
80 point. Males and females did not show any significant differences in learning ( $\text{Sessions}_{1-5}$ :  $t_{(16)} = -0.545$ ,  $p =$   
81  $0.593$ ;  $\text{Sessions}_{5-10}$ :  $t_{(7)} = -0.124$ ,  $p = 0.905$ ). When we looked at poke distributions, the proportion of nose-  
82 pokes between males and females remained similar (Figure 2Biii). However, we do note that males seem to  
83 have more short pokes ( $\sim 0.1$ s) while females tended to hold longer ( $\sim 1.4$  s). We then examined ITI and  
84 found no significant differences between males and females (Figure 2Biv;  $t_{(142)} = -0.258$ ,  $p = 0.797$ ).

85 Once past Poke&Hold<sub>side2</sub>, rats were then moved to OneOdor which began with habituating to one odor  
86 presentation on either end of the linear track. The hold time criterion was also reduced down to 1 s and rats  
87 were required to alternate between sides (Figure 2Ci). Rats were required to reach ~75% accuracy for 3  
88 consecutive sessions at this stage. We found no significant differences in learning between males and  
89 females (Sessions<sub>1-5</sub>:  $t_{(16)} = -1.123$ ,  $p = 0.278$ ; Sessions<sub>5-10</sub>:  $t_{(16)} = 1.034$ ,  $p = 0.317$ ; Sessions<sub>10-15</sub>:  $t_{(7)} = 0.774$ ,  
90  $p = 0.464$ ). We then looked at poke distributions between males and females; overall, we found they were  
91 very similar. Again, we observed males' tendencies towards short pokes (~0.1 - 0.2s) with females'  
92 tendencies towards longer pokes (~1.2 - 1.5s). At this stage we measured the time it took the rats to run  
93 between sequences which we refer to as inter-sequence-interval (ISI). We found no significant differences in  
94 ISI between males and females (Figure 2Civ;  $t_{(224)} = 0.655$ ,  $p = 0.513$ ). Overall, these results suggest that  
95 males and females show little to no differences in their poking and timing behaviors.

96

### 97 **Males and Females Perform Similarly on the Sequence Memory Task**

98 After reaching criterion for the OneOdor stage of training, rats are then moved onto TwoOdors where  
99 they are trained to poke for two separate odors on each side (Figure 3Ai; Seq1: A<sub>1</sub>B<sub>1</sub> and Seq2: A<sub>2</sub>B<sub>2</sub>). Once  
00 rats are able to poke twice on each side with ~70% accuracy, they are then trained to identify InSeq and  
01 OutSeq odors. The correct response to the first odor is always to hold the nose-poke for ≥1s (Odor A was  
02 always the first item). For the second odor, rats were required to determine whether the item was InSeq  
03 (AB; hold for 1 s to receive reward) or OutSeq (AA; withdraw before 1s to receive a reward). Rats were  
04 trained until they demonstrated sufficient performance (≥ 0.2 SMI) for three consecutive sessions. We  
05 calculated the SMI once OutSeq trials were introduced and examined the overall learning between males  
06 and females. Although we refer to memory in this stage as sequence memory, it is more equivalent to a  
07 delayed-to-non-match sample task which exclusively measures working memory. Position 1 was excluded  
08 because an OutSeq item was never presented in that position. Twenty sessions were used to measure  
09 learning at this stage. While some rats continued to learn past 20 sessions, there were not enough subjects  
10 to calculate an average. Generally, we found no significant differences in learning between males and  
11 females (Sessions<sub>1-5</sub>:  $t_{(16)} = 1.140$ ,  $p = 0.227$ ; Sessions<sub>5-10</sub>:  $t_{(16)} = 0.685$ ,  $p = 0.503$ ; Sessions<sub>10-15</sub>:  $t_{(15)} = -$

12 0.938,  $p = 0.363$ ; Sessions<sub>15-20</sub>:  $t_{(10)} = -0.394$ ,  $p = 0.702$ ). We also examined the overall SMI of the 3  
13 consecutive stages in which criterion was met. We found no significant difference between the sexes  
14 (Figure 3Aiii;  $t_{(52)} = 1.134$ ,  $p = 0.262$ , Male:  $0.347 \pm 0.022$ , Female:  $0.386 \pm 0.026$ ). Further, we examined  
15 whether there were differences between sequence 1 and sequence 2. A two-way ANOVA revealed no  
16 statistically significant interaction between sex and sequence ( $F_{(3,104)} = 0.031$ ,  $p = 0.860$ ). Simple main effect  
17 analysis showed that sex and sequence did not have a statistically significant effect on SMI (Sex:  $p = 0.304$ ;  
18 Sequence:  $p = 0.643$ ).

19 We examined the nose-poke distributions for both InSeq and OutSeq trials (Figures 3Av and 3Avi). The  
20 InSeq distribution showed the proportion of nose-pokes in males and females remained similar. On OutSeq  
21 trials, however, we see a modest difference between male and female poke times. Females tended to poke  
22 for OutSeq trials close to the 1s threshold ( $\sim 0.8 - 0.99$ s) whereas males continued to show short pokes  
23 ( $\sim 0.1 - 0.4$ s) in both InSeq and OutSeq trials. We evaluated whether males and females differed in nose-  
24 poke times on InSeq<sub>correct</sub> and OutSeq<sub>correct</sub> trials (Figure 3Avii). No significant differences were detected  
25 between males and females for InSeq<sub>correct</sub> trials ( $t_{(373)} = 1.195$ ,  $p = 0.233$ ). However, in OutSeq<sub>correct</sub> trials we  
26 found a significant difference, with females showing a slightly longer hold time ( $t_{(373)} = 9.609$ ,  $p = 1.119 \times 10^{-19}$ ;  
27 Male:  $0.446 \pm 0.020$ ; Female:  $0.678 \pm 0.014$ ) which corresponds with what we observed in the poke  
28 distribution. We then looked at the time rats spent between each odor trial (inter-odor-interval; IOI) and ISI.  
29 The IOI did not differ significantly between males and females (Figure 3Aviii;  $t_{(767)} = 1.495$ ,  $p = 0.135$ ),  
30 suggesting rats collected water rewards and engaged with the odors at similar rates. Furthermore, we found  
31 no effect by group on the ISI (Figure 3Aix;  $t_{(757)} = 0.312$ ,  $p = 0.755$ ), suggesting rats in both groups  
32 alternated at similar rates between sequences.

33 Once rats reach criterion in the TwoOdor training stage, they are moved to ThreeOdors. In this stage,  
34 one more odor is added to each sequence (Figure 3Bi; Seq1: A<sub>1</sub>B<sub>1</sub>C<sub>1</sub> and Seq2: A<sub>2</sub>B<sub>2</sub>C<sub>2</sub>). Rats were trained  
35 to poke three times on either side with at least  $\sim 65\%$  accuracy before being introduced to the OutSeq probe  
36 trials. With this three-item sequence the number of possible OutSeq configurations has expanded, making  
37 this the first stage to test sequence memory. Rats were trained up until they demonstrated sufficient  
38 sequence memory ( $\geq 0.2$  SMI) for three consecutive trials to move onto the final training stage. We

39 averaged the first twenty sessions to measure learning. We found a significant difference in the first five  
40 sessions where males seemed to learn at a faster rate compared to females (Figure 3Bii; Sessions<sub>1-5</sub>:  $t_{(16)} =$   
41  $-2.471$ ,  $p = 0.025$ ). However, this difference diminished with the subsequent sessions (Sessions<sub>5-10</sub>:  $t_{(14)} =$   
42  $1.131$ ,  $p = 0.277$ ; Sessions<sub>10-15</sub>:  $t_{(12)} = -0.037$ ,  $p = 0.971$ ; Sessions<sub>15-20</sub>:  $t_{(9)} = -0.206$ ,  $p = 0.842$ ).

43 We then examined the overall SMI using data from after subjects had reached the behavioral criterion.  
44 We found no significant differences between males and females (Figure 3Biii;  $t_{(52)} = -1.755$ ,  $p = 0.085$ , Male:  
45  $0.428 \pm 0.015$ , Female:  $0.394 \pm 0.012$ ). We also observed no significant interactions between sex and  
46 sequence ( $F_{(3,104)} = 0.059$ ,  $p = 0.808$ ). A simple main effect analysis showed that sex and sequence did not  
47 have a statistically significant effect on SMI (Sex:  $p = 0.094$ ; Sequence:  $p = 0.182$ ).

48 We then evaluated the nose-poke distributions for both InSeq and OutSeq trials (Figure 3Bv and 3Bvi).  
49 The InSeq distribution shows a similar proportion of nose-pokes in males and females. The OutSeq trials  
50 showed that males poked between  $\sim 0.4 - 0.7$ s whereas females tended to poke between  $\sim 0.8 - 0.95$ s. We  
51 also saw more short pokes from males in both InSeq and OutSeq trials. We evaluated non-mnemonic  
52 behaviors by examining nose-poke behaviors, IOI, and ISI. Additionally, InSeq<sub>correct</sub> nose-poke times  
53 between males and females did not significantly differ (Figure 3Bvii;  $t_{(344)} = 1.718$ ,  $p = 0.087$ ). There was a  
54 significant difference in OutSeq<sub>correct</sub> trials with females holding longer (Figure 3Bvii;  $t_{(344)} = 5.619$ ,  $p = 3.965$   
55  $\times 10^{-8}$ ; Males:  $0.501 \pm 0.021$ ; Females:  $0.643 \pm 0.015$ ). The IOI and ISI did not differ significantly between  
56 males and females (Figure 3Bviii and 3Bix; IOI:  $t_{(562)} = 1.568$ ,  $p = 0.118$ ; ISI:  $t_{(562)} = 1.431$ ,  $p = 0.153$ ).  
57 Overall, these results suggest that males and females do not differ in working memory. However, males  
58 show a slight advantage in learning the OutSeq rule during the ThreeOdor training stage.

59 Finally, upon successfully completing the ThreeOdor training stage, an additional odor is introduced to  
60 each sequence (Seq1: A<sub>1</sub>B<sub>1</sub>C<sub>1</sub>D<sub>1</sub> and Seq2: A<sub>2</sub>B<sub>2</sub>C<sub>2</sub>D<sub>2</sub>). Rats were trained until they achieved  $\sim 65\%$   
61 accuracy in differentiating between InSeq and OutSeq ( $\geq 0.2$  SMI). Once this criterion was met, we then ran  
62 the rats for 15 consecutive sessions (Figure 4). We took the averaged results from 25 sessions after the  
63 task was learned in order to describe overall learning and performance. We found no significant difference  
64 in learning between males and females. (Figure 4B; Sessions<sub>1-5</sub>:  $t_{(16)} = 0.221$ ,  $p = 0.828$ ; Sessions<sub>5-10</sub>:  $t_{(16)} = -$   
65  $0.176$ ,  $p = 0.862$ ; Sessions<sub>10-15</sub>:  $t_{(16)} = -0.214$ ,  $p = 0.833$ ; Sessions<sub>15-20</sub>:  $t_{(16)} = -0.437$ ,  $p = 0.668$ ; Sessions<sub>20-25</sub>:

66  $t_{(14)} = 1.701, p = 0.111$ ). By session ten, most rats reached behavioral criterion (asymptotic sequence  
67 memory performance levels over multiple sessions). Overall, rats demonstrated strong sequence memory  
68 (Figure 4C; Male:  $0.262 \pm 8.690 \times 10^{-3}$ , Female:  $0.272 \pm 8.120 \times 10^{-3}$ ) and performance did not differ  
69 significantly between males and females (Figure 4Ci; SMI:  $t_{(268)} = 0.784, p = 0.434$ ). Both males and females  
70 performed well above chance levels on sequence 1 (Male:  $0.268 \pm 0.017$ ; Female:  $0.280 \pm 0.018$ ) and  
71 sequence 2 (Male:  $0.279 \pm 0.016$ ; Female:  $0.318 \pm 0.018$ ), with no significant interactions between  
72 sequences or sex (Figure 4Cii;  $F_{(1,479)} = 0.608, p = 0.436$ ). Simple main effect analysis showed that sex and  
73 sequence did not have a statistically significant effect on SMI (Sex:  $p = 0.160$ ; Sequence:  $p = 0.177$ ),  
74 indicating rats successfully switched between the two sequences.

75 We evaluated non-mnemonic effect of sex by examining IOI and ISI. The IOI and ISI did not differ  
76 significantly between males and females (Figure 4D and 4E; IOI:  $t_{(278)} = -0.569, p = 0.570$ ; ISI:  $t_{(278)} = 0.162,$   
77  $p = 0.871$ ). We analyzed the poke distribution between males and females (Figure 4Fi and Fii). The InSeq  
78 and OutSeq distribution showed the proportion of nose-pokes remained similar between males and females.  
79 However, there was a slight increase in the proportion of InSeq and OutSeq nose-pokes near the short  
80 distribution peak for males ( $\sim 0.1 - 0.2$ s). We also examined whether sex affected nose-poke times on  
81 InSeq<sub>correct</sub> and OutSeq<sub>correct</sub> trials (Figure 4G). No significant differences were detected in InSeq<sub>correct</sub> trials  
82 ( $t_{(268)} = -1.925, p = 0.055$ ). In the OutSeq<sub>correct</sub> trials there was a significant increase in nose-poke time for  
83 females ( $t_{(268)} = 3.617, p = 3.560 \times 10^{-4}$ ; Male:  $0.443 \pm 0.020$ ; Female:  $0.544 \pm 0.019$ ). Overall, these results  
84 demonstrate that males and females do not differ in their overall sequence memory. However, there are  
85 slight differences in their hold times for OutSeq trials, which may indicate uncertainty regarding whether a  
86 trial was InSeq or OutSeq rather than a deficit related to basic nose-poke behavior or sequence memory.

87

### 88 **Estrous Cycle in Sequence Memory**

89 Generally, the results demonstrate that males and females do not differ in learning and performance on  
90 the sequence memory task. We then looked at estrous cycle phases within females, as the fluctuations of  
91 female hormone levels are important factors to consider when working with female animals. Figure 5A  
92 illustrates the hormone level in female rats during each of the four phases of the estrous cycle. In the

93 proestrus phase, ovulation begins with the sharp increase and decrease of progesterone, increase of  
94 estradiol, and decrease of luteinizing hormone (LH). In the estrus phase, known as the “heat phase”,  
95 progesterone remains steady, estradiol peaks and begins to decrease while LH decreases. In the metestrus  
96 phase, all hormones remain steady. Finally, in the diestrus phase LH begins to increase slowly.

97 We first examined the overall SMI once rats reach asymptotic levels on the fully learned sequence  
98 memory task. We found no significant differences between the estrous cycle phases (Figure 5Bi;  $F_{(3, 146)} =$   
99  $1.405, p = 0.244$ ). We also observed no significant differences between estrous and sequence (Figure 5Bii:  
00  $F_{(7, 270)} = 3.56, p = 0.078$ ). Simple main effect analysis showed that estrous and sequence were not  
01 statistically significant (Estrous:  $p = 0.433$ ; Sequence:  $p = 0.322$ ). We then observed the general poke  
02 distributions for InSeq and OutSeq trials between the estrous cycle phases. For InSeq trials, all estrous  
03 cycle phases showcased a cluster of pokes slightly after the 1 s decision threshold (Figure 5Ci). For OutSeq  
04 trials, there are two main peaks of nose-pokes around 0.2 s and 0.8 s (Figure 5Cii). We did observe that  
05 there was a slight increase in poke times during estrus (~0.2 – 0.3s) in comparison to the other three  
06 phases. Next, we evaluated the nose-poke times for InSeq and OutSeq correct trials. There were no  
07 significant differences in InSeq<sub>correct</sub> trials between the estrous cycle phases (Figure 5D;  $F_{(3, 149)} = 0.667, p =$   
08  $0.573$ ). There was a significant difference in OutSeq<sub>correct</sub> trials (Figure 5D;  $F_{(3, 149)} = 3.301, p = 0.022$ ). Post  
09 hoc comparisons using Bonferroni test revealed a significant difference between estrus and metestrus ( $p =$   
10  $0.033$ ) with a mean difference poke time of 0.177s. We explored non-mnemonic effects relevant to the  
11 sequence task. We looked at IOI and ISI and found no significant differences between the estrous cycle  
12 phases within those conditions (Figure 5E and 5F: IOI:  $F_{(3, 149)} = 0.676, p = 0.568$ ; ISI:  $F_{(3, 149)} = 0.416, p =$   
13  $0.742$ ). These results that the estrous cycle does not strongly affect overall sequence memory performance.

14

15

## DISCUSSION

16

### Summary of Main Findings

17

18

19

We evaluated the role of sex in rats during training and testing phases of a sequence memory task. Although this task has been used in previous studies (Allen et al., 2014, 2016a; Jayachandran et al., 2019). here we describe the stages of training and its performance criterion for the first time. Overall, both male

20 and female rats learned the sequence memory task at relatively the same rate. However, there were a few  
21 differences between males and females. Males tended to have a modest number of shorter poke times  
22 compared to females, which was more evident once OutSeq trials were introduced, but this did not affect  
23 overall accuracy. Moreover, males seemed to learn at a somewhat faster rate once the sequence was  
24 expanded to include more than one OutSeq position (ThreeOdor) but this effect did not extend to the full  
25 sequences. In general, there were no noticeable sex differences in sequence memory once the task was  
26 fully learned. This finding alone, however, did not address whether the lack of sex differences could have  
27 been confounded by female rats' estrous cycle. Therefore, we looked at estrous cycle specifically and found  
28 that regardless of phase, females performed similarly well on the sequence memory task.

### 29 **No Evidence that Sequence Memory Differs in Males and Females**

30 To investigate sex differences in sequence memory, we examined males and females at each training  
31 stage of the sequence task. One main difference we observed was with the introduction of the three-item  
32 sequence. At this stage, we found males had a faster learning curve compared to females. This advantage  
33 could be due to males' tendency for short pokes, allowing them more opportunities to have chance correct  
34 responses for OutSeq trials and thus providing a modest boost in discovering the rules. This may not reflect  
35 sex differences in learning per se, but rather sex differences in strategies (Gruene et al., 2015). This has  
36 been suggested before for spatial learning paradigms, in which male rats outperform females by using a  
37 more direct strategy (McCarthy & Konkle, 2005). This difference could also be due to Type I family-wise  
38 error. As multiple tests were run at multiple stages and therefore these differences could be minor.  
39 Moreover, this advantage was not observed once the rats moved to the final stage of training (FourOdors),  
40 where overall sequence memory did not differ between sexes. This is further supported by Reeders et al.,  
41 (2021) who did not observe sex differences in humans performing an analogous task. Importantly, sequence  
42 memory effects were consistent across two different sequences. This eliminated the possibility that males  
43 and females show preference for a specific sequence or odors throughout the entirety of a session.

44 Apart from examining the general learning rates at each stage, we also performed several analyses to  
45 test whether males and females differed in non-memory related behaviors in the sequence task. We saw no  
46 effects between males and females on reward retrieval activity (ITI & IOI), on the time it took to run between



47 sequence (ISI), or on the overall frequency of nose pokes in which rats held the nose poke response for  $\geq 1$   
48 s (InSeq trials). We did observe females had modestly longer hold times compared to males for OutSeq  
49 trials. This was more clearly revealed in the analysis of poke time histogram where males showed a  
50 tendency to have shorter poke times whereas females showed a tendency to have longer poke times.

51 Although, several studies have shown a robust male advantage in working and reference memory (Roof  
52 et al., 1993; Veng et al., 2003), other studies indicate no differences or a female advantage (Bucci et al.,  
53 2021; Healy et al., 1999; Lamberty & Gower, 1988). These confounding observations in sex differences  
54 have been associated with different factors within the task parameters. For example, a consistent start  
55 position for each trial has been associated with a lack of sex differences (Roof & Stein, 1999). Pre-training  
56 has also been shown to reduce sex differences (Jonasson, 2005a; Perrot-Sinal et al., 1996). Generally  
57 speaking, male and female rodents typically reach identical levels of performance on most cognitive tasks  
58 although their rates and strategies of learning may differ.

### 59 **No Evidence Sequence Memory Differs Across Estrous Cycle**

60 Several studies have postulated that hormone fluctuations across the estrus cycle may account for sex  
61 differences (McEwen & Milner, 2017; Sherry & Hampson, 1997; Warren & Juraska, 1997). However, no  
62 clear consensus has emerged regarding the influence of estrous cycle on learning and memory. It has been  
63 argued that estrous cycle cannot be causally linked to more variability in females relative to males  
64 (Prendergast et al., 2014). Pompili et al. (2010) observed no variation in performance associated with cycle  
65 phase when using the radial-arm maze. Stackman et al. (1997), using a delayed nonmatching-to-sample  
66 paradigm in the radial-arm maze, found no effect of estrous cycle. Nevertheless, it is important to consider  
67 sex hormones in behavior. Therefore, we examined sequence memory across phases of estrous cycle. In  
68 general, we did not find differences between the phases of estrous cycle in sequence memory. It is possible  
69 that pre-training might have reduced the sensitivity of this assessment (Bannerman et al., 1995; D. Saucier  
70 & Cain, 1995). However, effects of the cycle on memory are somewhat subtle and inconsistent, so they may  
71 wash out when averaging across multiple females.

72 Interestingly, while sequence memory was not affected by the day of estrous cycle, performance on  
73 estrus was characterized by longer OutSeq poke times. One natural issue presented by measuring estrous

74 cycle for this task is the asymmetry of the length of stages; because each stage averages a different length  
75 of time, we would expect to see far more trials occurring during these longer stages than the shorter ones.  
76 To the extent that proestrus, metestrus and diestrus is over-represented compared to estrus, which could  
77 have skewed the group mean. Several studies report that spatial memory tested in the Morris water maze or  
78 object placement tasks was enhanced during proestrus relative to estrus and/or diestrus in mice and rats  
79 (Frick & Berger-Sweeney, 2001; Frye, 1995; Paris & Frye, 2008; Pompili et al., 2010). However, the  
80 reported proestrus advantage in spatial tasks is inconsistent with other data in rats showing enhanced  
81 spatial reference memory during estrus relative to proestrus (Frye, 1995; Sutcliffe et al., 2007a; Warren &  
82 Juraska, 1997) or no detectable effect of the cycle on memory (Berry et al., 1997; Bucci et al., 2008;  
83 Cimadevilla et al., 2000; Conrad et al., 2004; Pompili et al., 2010; Stackman et al., 1997). While the exact  
84 cognitive bases are not yet known, Korol & Kolo (2002) have suggested that the direction of estrogen effects  
85 on performance depends upon the availability of strategies or solutions that match the participation of neural  
86 or cognitive systems. Thus, the general effects of estrogen on memory are somewhat ambiguous  
87 (Dohanich, 2002). The sequence task used here is known to involve multiple strategies including temporal  
88 contexts, ordinal representations and working memory (e.g., Reeders et al., 2021; Jayachandran et al.,  
89 2019)

## 90 **Conclusions**

91 We present evidence that sex and estrous cycle do not influence memory for sequences of events  
92 suggesting that this core aspect of episodic memory does not differ between the sexes. These data are  
93 consistent with few other studies that have investigated sex differences and estrous cycle as it pertains to  
94 behavior in rodents as well as in humans (Bucci et al., 2021; Healy et al., 1999; Reeders et al., 2021;  
95 Schmidt et al., 2009; Stackman et al., 1997). However, further studies are needed to fully characterize the  
96 effects of sex hormones on sequence memory in both male and female rats by comparing the effects of  
97 gonadectomy and possible hormone replacement. For now, the consideration of sex and estrous cycle as a  
98 biological variable will have significantly advanced our understanding of the basic mechanisms of learning  
99 and memory.

01  
02  
03  
04  
05  
06  
07  
08  
09  
10  
11  
12  
13  
14  
15  
16  
17  
18  
19  
20  
21  
22  
23  
24  
25  
26  
27

## ACKNOWLEDGMENTS

This work was supported by NIH grants R01 MH113626 and F99 NS119001. A special thanks to all the members of the Allen Lab, specifically our undergraduate research assistants, Andy Garcia, Sofia Levya, and Chiara Pavon, who helped with task training and data collection. Also, we would like to thank the Animal Care Facility and Dr. H. Vinerean DVM, DACLAM.

## AUTHOR CONTRIBUTIONS

Conceptualization, T.A.A. and M.J.; Methodology, T.A.A. and M.J.; Investigation, M.J., P.L., F.P.R.; Writing – Original Draft, M.J., P.L., T.A.A.; Writing – Review and Editing, M.J., P.L., F.P.R., T.A.A., R.P.V.; Funding Acquisition, M.J., T.A.A. and R.P.V.; Resources, T.A.A., R.P.V.; Supervision, T.A.A.

## DECLARATION OF INTERESTS

The authors declare no competing interests.

28

FIGURE CAPTIONS

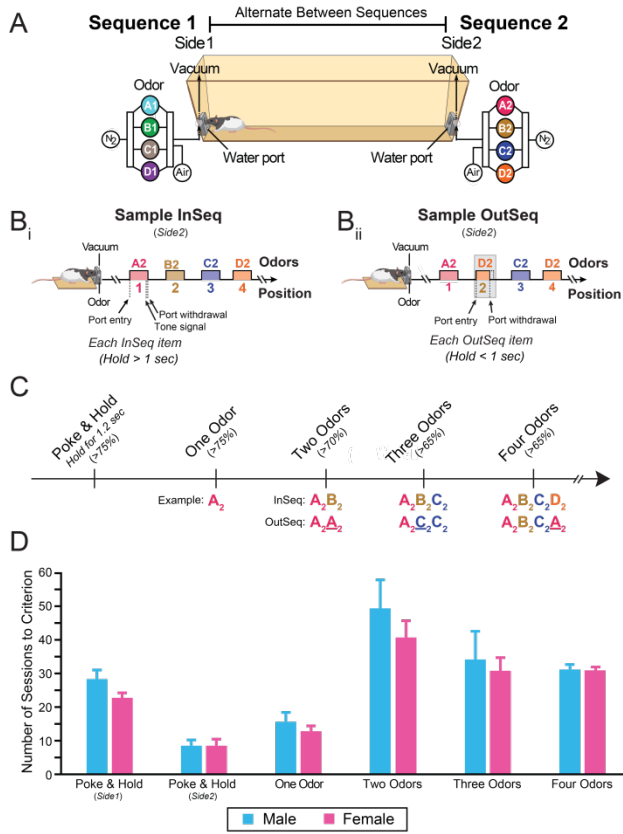

29

30

**Figure 1. Sequence Memory Task**

(A) A 2m linear track was used with odor ports located at opposite ends where two four-odor sequences were presented (Seq1: A<sub>1</sub>B<sub>1</sub>C<sub>1</sub>D<sub>1</sub> and Seq2: A<sub>2</sub>B<sub>2</sub>C<sub>2</sub>D<sub>2</sub>).

(B) Rats had to correctly identify the odors as either InSeq by holding their nose in the port for > 1 s (Bi) or OutSeq where the rat withdrew their nose prior to 1 s (Bii).

(C) Timeline showing the criterion for each training stage for the sequence memory task.

(D) Males and females did not differ in the average number of sessions per training stage.

37

All data are represented as mean ± SEM. \*p < 0.05; \*\*p < 0.01; \*\*\*p < 0.001

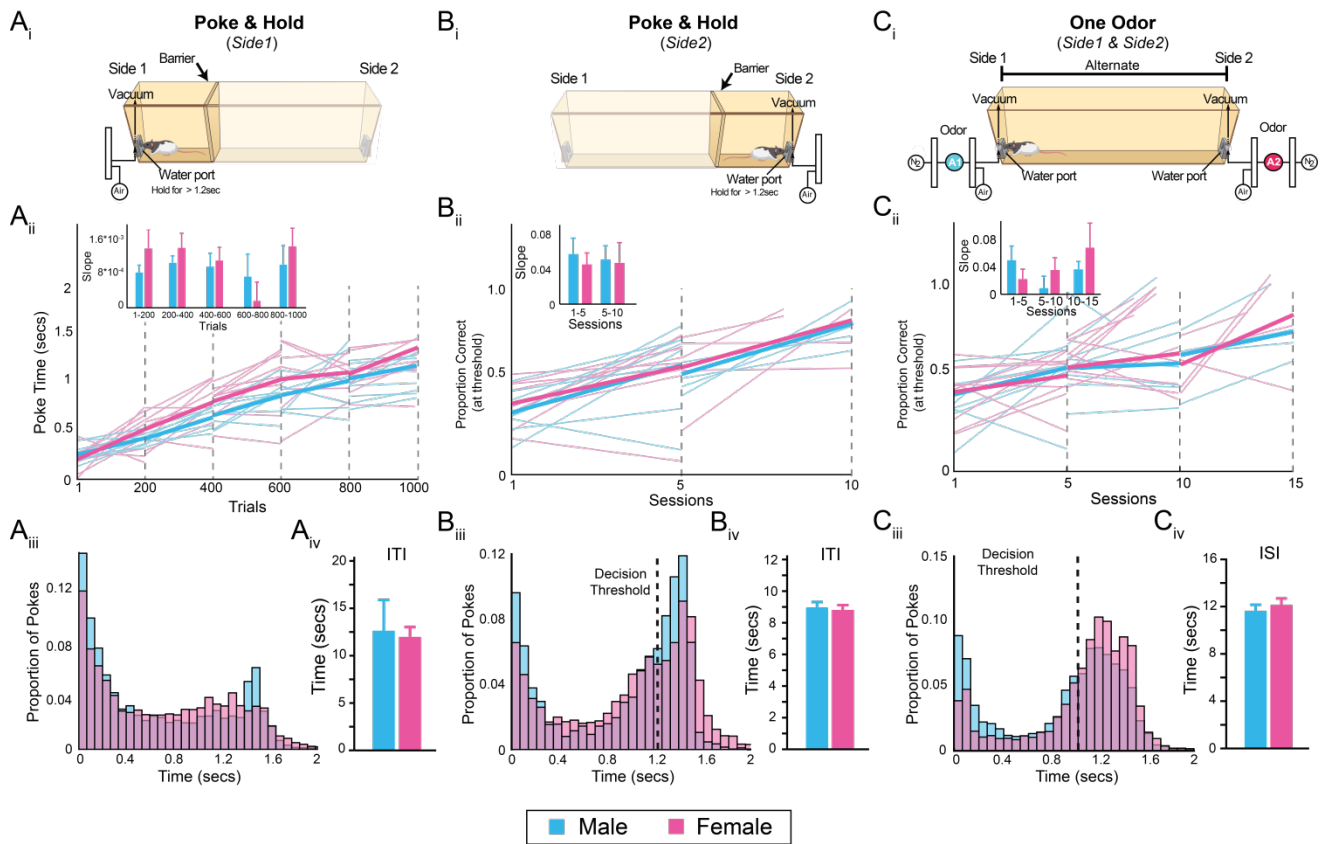

38  
39

**Figure 2. Males and Females Do Not Differ in Poking Behaviors**

(A<sub>i</sub>) Rats were trained to hold their nose in the nose-port on side 1 for 1.2 s.  
 (A<sub>ii</sub>) Males and females show no significant differences in the rate of learning across trials.  
 (A<sub>iii</sub>) Males and females poke times were relatively similar.  
 (A<sub>iv</sub>) Inter-trial-interval (ITI) was not significantly different between males and females  
 (B<sub>i</sub>) Rats were trained to hold their nose in the nose-port on side 2 for 1.2 s.  
 (B<sub>ii</sub>) No significant differences found between males and females in the rate of learning across sessions.  
 (B<sub>iii</sub>) Males and females show subtle shifts in behavior where males show a tendency to have short poke times. Both males and females had increased number of pokes at the decision threshold (1.2 s).  
 (B<sub>iv</sub>) ITI between sexes were not significantly different.  
 (C<sub>i</sub>) Rats were introduced to one odor on either side of the maze and were trained to alternate holding their nose in the pose-port on both sides of the maze for 1 s.  
 (C<sub>ii</sub>) No significant differences found between males and females in the rate of learning across sessions.  
 (C<sub>iii</sub>) Male and female rats show subtle shifts in behavior where males show a tendency to have shorter poke times.  
 (C<sub>iv</sub>) ISI between males and females was not significantly different.  
 All data are represented as mean ± SEM. \*p < 0.05; \*\*p < 0.01; \*\*\*p < 0.001

56

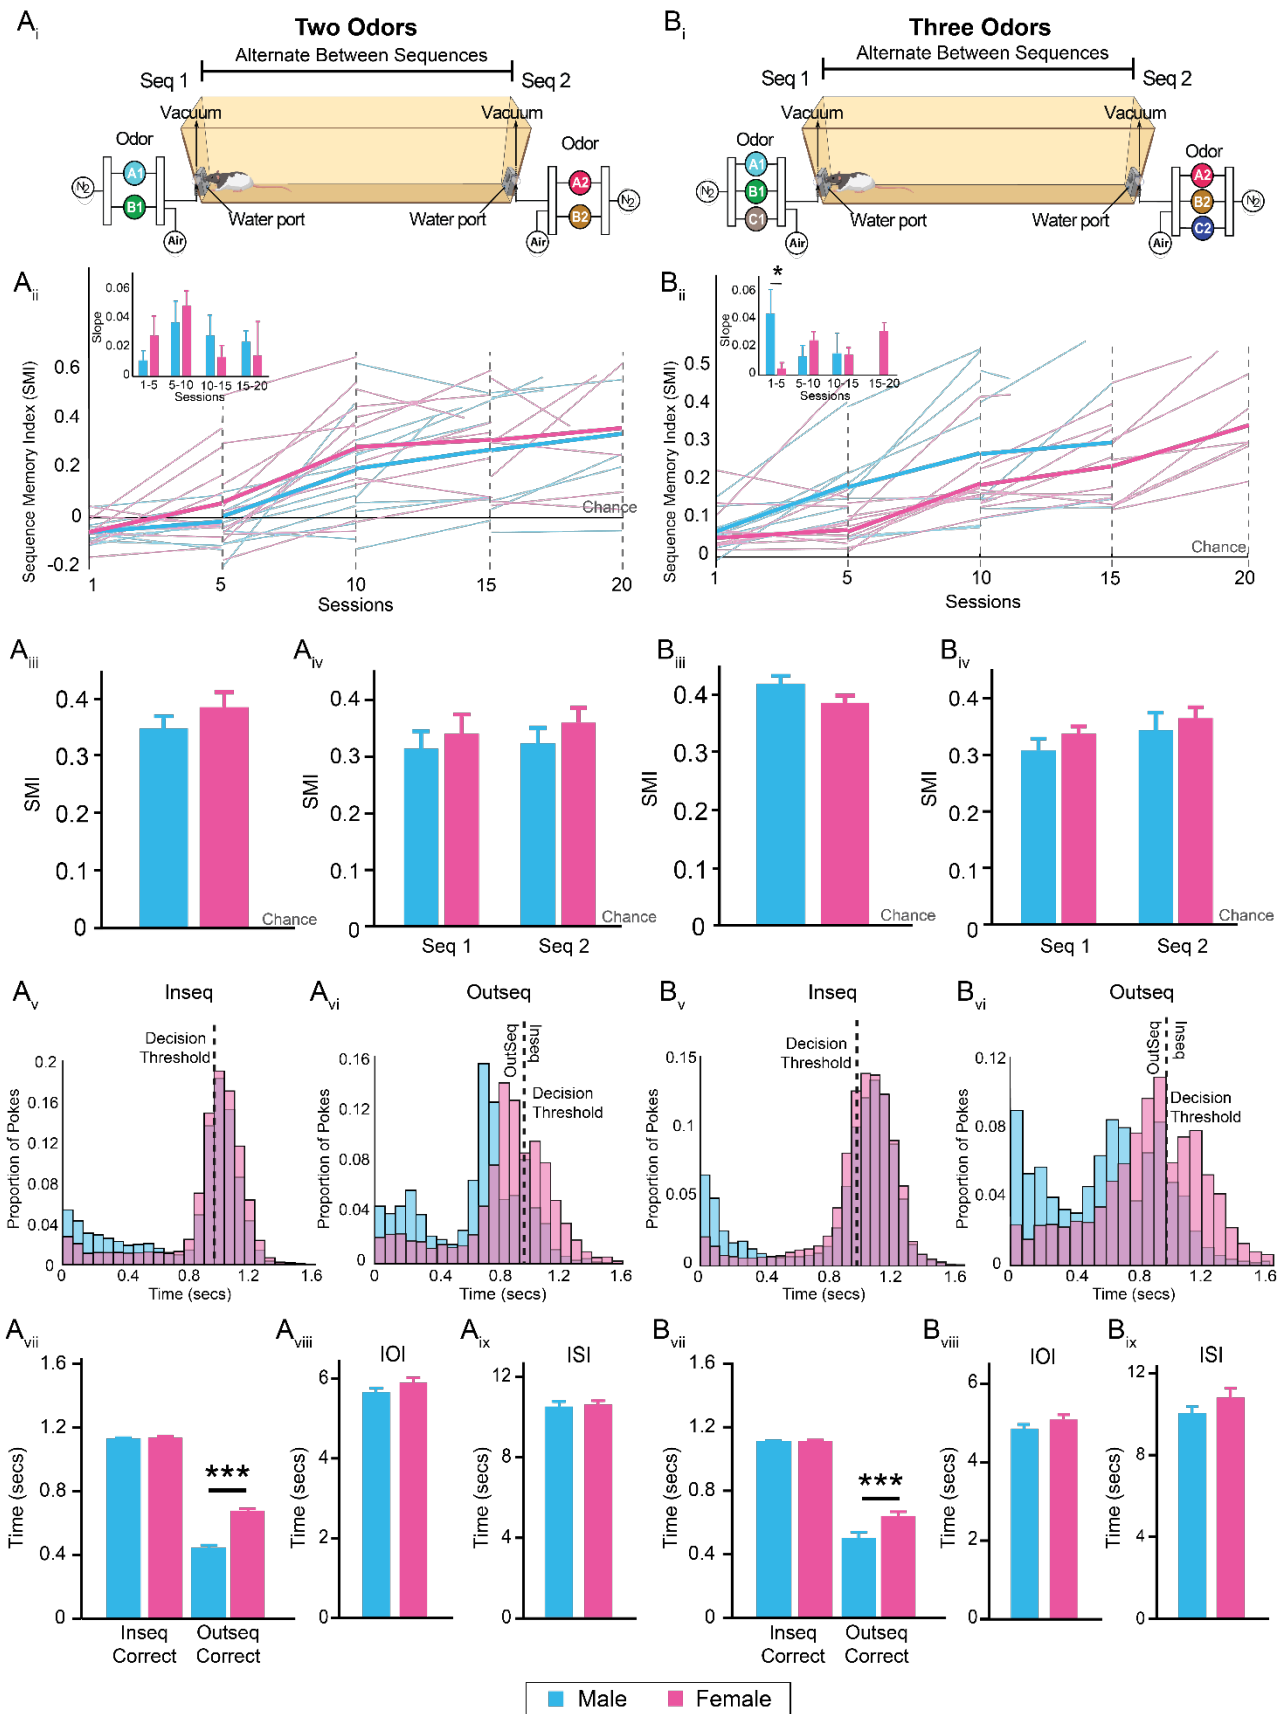

**Figure 3. Learning Differs Between Males and Females**

(A<sub>i</sub>) A second odor was added to either side of the maze (Seq1: A<sub>1</sub>B<sub>1</sub> and Seq2: A<sub>2</sub>B<sub>2</sub>).

- 61 (A<sub>ii</sub>) Performance did not differ between males and females in the rate of learning across sessions.  
62 (A<sub>iii</sub>) SMI was not significantly different between males and females.  
63 (A<sub>iv</sub>) SMI was not significantly different between sequence 1 and sequence 2  
64 (A<sub>v</sub>) Males and females poke times were relatively similar.  
65 (A<sub>vi</sub>) Female nose-poke times show an increase in longer hold times while male poke times distribute  
66 between short and long poke times  
67 (A<sub>vii</sub>) InSeq<sub>correct</sub> trials did not differ between males and females. OutSeq<sub>correct</sub> nose-poke times were  
68 significantly different between males and females.  
69 (A<sub>viii</sub>) Inter-odor-interval (IOI) was not significantly different between sexes  
70 (A<sub>ix</sub>) Inter-sequence-interval (ISI) was not significantly different between males and females  
71 (B<sub>i</sub>) A third odor was added to both sides of the maze (Seq1: A<sub>1</sub>B<sub>1</sub>C<sub>1</sub> and Seq2: A<sub>2</sub>B<sub>2</sub>C<sub>2</sub>).  
72 (B<sub>ii</sub>) Learning rate between males and females was statistically significant during the first five sessions. As  
73 sessions continued, males and females no longer differed.  
74 (B<sub>iii</sub>) SMI was not significantly different between males and females.  
75 (B<sub>iv</sub>) SMI was not significantly different between sequence 1 and sequence 2.  
76 (B<sub>v</sub>) Male and female poke times for InSeq trials were relatively similar. Males have an increase in shorter  
77 poke times.  
78 (B<sub>vi</sub>) Males show an increase number of short pokes for OutSeq trials while females showed longer hold  
79 times.  
80 (B<sub>vii</sub>) InSeq<sub>correct</sub> trials did not differ between males and females. OutSeq<sub>correct</sub> poke times were significantly  
81 different between males and females.  
82 (B<sub>viii</sub>) IOI did not differ between males and females  
83 (B<sub>ix</sub>) ISI did not differ between males and females.  
84 All data are represented as mean ± SEM. \*p < 0.05; \*\*p < 0.01; \*\*\*p < 0.001  
85

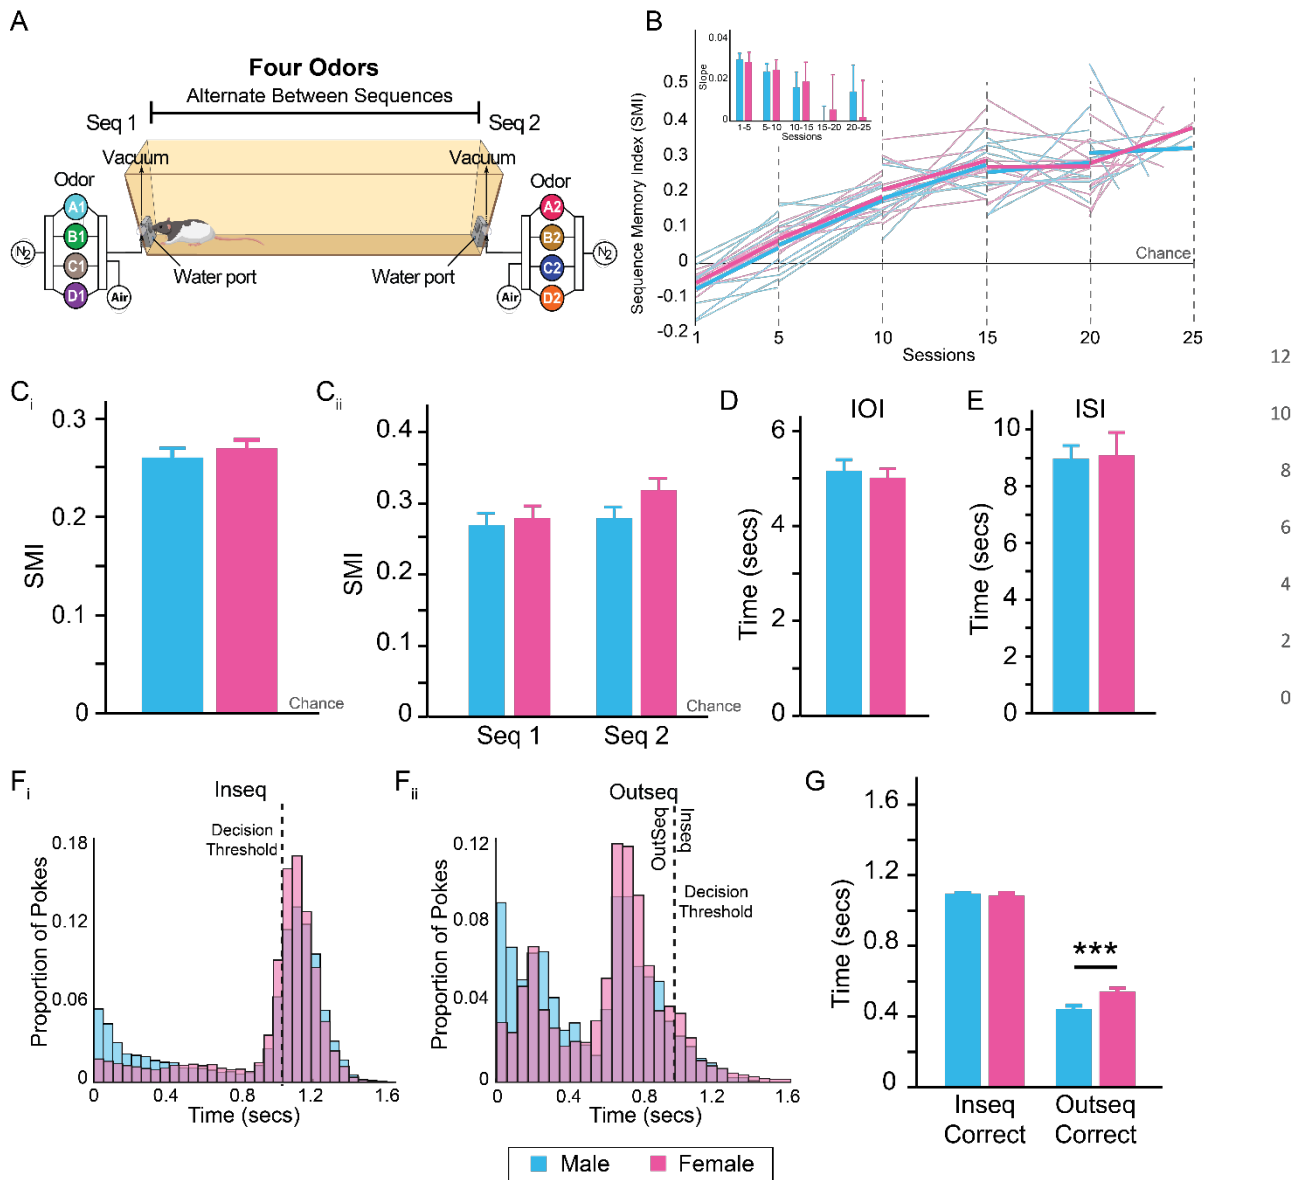

**Figure 4. Males and Females Perform Similarly on the Sequence Memory Task**

(A) Rats were trained in the final stage of the sequence memory task with four odors in each sequence (Seq1: A<sub>1</sub>B<sub>1</sub>C<sub>1</sub>D<sub>1</sub> and Seq2: A<sub>2</sub>B<sub>2</sub>C<sub>2</sub>D<sub>2</sub>).

(B) Males and females showed no significant differences in the rate of learning across sessions.

(C<sub>i</sub>) SMI was not significantly different between males and females.

(C<sub>ii</sub>) SMI did not show any interaction effects between sequence 1 and sequence 2 and sex.

(D) IOI was not statistically different between males and females.

(E) ISI was not statistically different between males and females.

(F<sub>i</sub>) Male and female poke distributions are relatively similar for InSeq trials

(F<sub>ii</sub>) OutSeq poke distributions show subtle changes with males demonstrating an increase in shorter pokes compared to females.

(G) InSeq<sub>correct</sub> trials did not differ between males and females. OutSeq<sub>correct</sub> trials showed a significant difference between sexes.

All data are represented as mean ± SEM. \*p < 0.05; \*\*p < 0.01; \*\*\*p < 0.001

86  
87

01



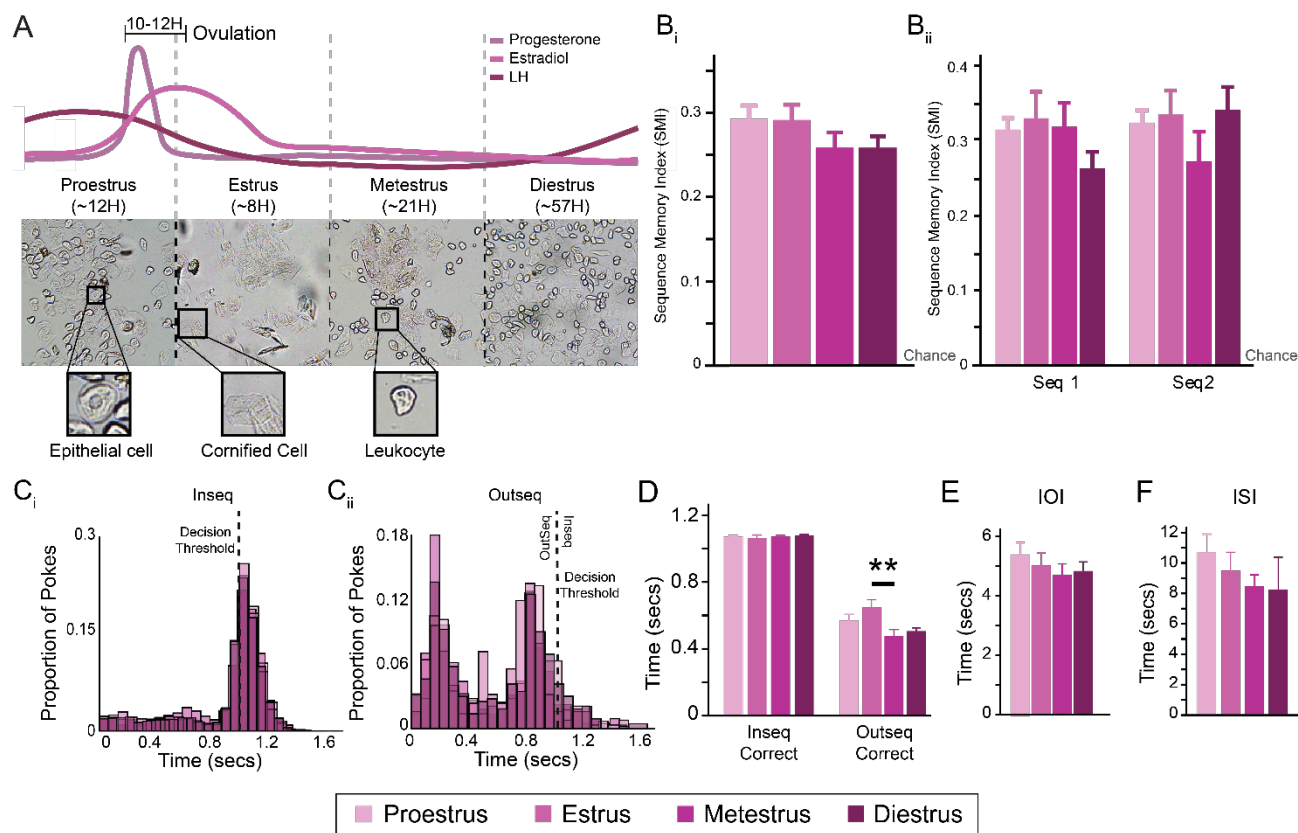

02  
03

04

05

06

07

08

09

10

11

12

13

14

15

16

17

18

19

20

21

22

23

24

25  
26  
27  
28  
29  
30  
31  
32  
33  
34  
35  
36  
37  
38  
39  
40  
41  
42  
43  
44  
45  
46  
47  
48  
49  
50  
51

## REFERENCES

- Allen, L. M., Lesyshyn, R. A., O'Dell S. J., Allen, T. A., Fortin, N. J. (2020). The hippocampus, prefrontal cortex, and perirhinal cortex are critical to incidental order memory. *Behavioural Brain Research*, 379, 112215. <https://doi.org/10.1016/j.bbr.2019.112215>
- Allen, T. A., Morris, A. M., Mattfeld, A. T., Stark, C. E. L., & Fortin, N. J. (2014). A sequence of events model of episodic memory shows parallels in rats and humans. *Hippocampus*, 24(10), 1178–1188. <https://doi.org/10.1002/hipo.22301>
- Allen, T. A., Morris, A. M., Stark, S. M., Fortin, N. J., & Stark, C. E. L. (2015). Memory for sequences of events impaired in typical aging. *Learning & Memory*, 22(3). <https://doi.org/10.1101/lm.036301.114>
- Allen, T. A., Salz, D. M., McKenzie, S., & Fortin, N. J. (2016). Nonspatial Sequence Coding in CA1 Neurons. *The Journal of Neuroscience*, 36(5). <https://doi.org/10.1523/JNEUROSCI.2874-15.2016>
- Bannerman, D. M., Good, M. A., Butcher, S. P., Ramsay, M., & Morris, R. G. M. (1995). Distinct components of spatial learning revealed by prior training and NMDA receptor blockade. *Nature*, 378(6553). <https://doi.org/10.1038/378182a0>
- Barha, C. K., Dalton, G. L., & Galea, L. A. (2010). Low Doses of 17 $\alpha$ -Estradiol and 17 $\beta$ -Estradiol Facilitate, Whereas Higher Doses of Estrone and 17 $\alpha$ - and 17 $\beta$ -Estradiol Impair, Contextual Fear Conditioning in Adult Female Rats. *Neuropsychopharmacology*, 35(2). <https://doi.org/10.1038/npp.2009.161>
- Berry, B., McMahan, R., & Gallagher, M. (1997). Spatial learning and memory at defined points of the estrous cycle: Effects on performance of a hippocampal-dependent task. *Behavioral Neuroscience*, 111(2). <https://doi.org/10.1037/0735-7044.111.2.267>
- Bettis, T., & Jacobs, L. F. (2012). Sex differences in object recognition are modulated by object similarity. *Behavioural Brain Research*, 233(2), 288–292. <https://doi.org/10.1016/j.bbr.2012.04.028>
- Blanchard, R. J., Carol, D., & Blanchard, V. (1968). Passive avoidance: A variety of fear conditioning? In *Psych on. Sci* (Vol. 13). DOI:10.3758/BF03342386
- Bucci, D. J., Chiba, A. A., & Gallagher, M. (1995). Spatial learning in male and female Long-Evans rats. *Behavioral Neuroscience*, 135(1). <https://doi.org/10.1037/bne0000437>

- 52 Bucci, D. J., Hopkins, M. E., Nunez, A. A., Breedlove, S. M., Sisk, C. L., & Nigg, J. T. (2008). Effects of sex  
53 hormones on associative learning in spontaneously hypertensive rats. *Physiology & Behavior*, 93(3).  
54 <https://doi.org/10.1016/j.physbeh.2007.11.005>
- 55 Chai, X. J., & Jacobs, L. F. (2010). Effects of cue types on sex differences in human spatial memory.  
56 *Behavioural Brain Research*, 208(2), 336–342. <https://doi.org/10.1016/j.bbr.2009.11.039>
- 57 Chesler, E. J., & Juraska, J. M. (2000). Acute Administration of Estrogen and Progesterone Impairs the  
58 Acquisition of the Spatial Morris Water Maze in Ovariectomized Rats. *Hormones and Behavior*,  
59 38(4). <https://doi.org/10.1006/hbeh.2000.1626>
- 60 Cimadevilla, J. M., Fenton, A. A., & Bures, J. (2000). Continuous place avoidance task reveals differences in  
61 spatial navigation in male and female rats. *Behavioural Brain Research*, 107(1–2).  
62 [https://doi.org/10.1016/S0166-4328\(99\)00128-X](https://doi.org/10.1016/S0166-4328(99)00128-X)
- 63 Conrad, C. D., Jackson, J. L., Wiczorek, L., Baran, S. E., Harman, J. S., Wright, R. L., & Korol, D. L.  
64 (2004). Acute stress impairs spatial memory in male but not female rats: influence of estrous cycle.  
65 *Pharmacology Biochemistry and Behavior*, 78(3). <https://doi.org/10.1016/j.pbb.2004.04.025>
- 66 Davis, D. M., Jacobson, T. K., Aliakbari, S., & Mizumori, S. J. Y. (2005). Differential effects of estrogen on  
67 hippocampal- and striatal-dependent learning. *Neurobiology of Learning and Memory*, 84(2), 132–  
68 137. <https://doi.org/10.1016/j.nlm.2005.06.004>
- 69 Dohanich, G. (2002). Gonadal Steroids, Learning, and Memory. In *Hormones, Brain and Behavior*. Elsevier.  
70 <https://doi.org/10.1016/B978-012532104-4/50024-X>
- 71 Eichenbaum, H., & Fortin, N. J. (2005). Bridging the gap between brain and behavior: cognitive and neural  
72 mechanisms of episodic memory. *Journal of the Experimental Analysis of Behavior*, 84(3).  
73 <https://doi.org/10.1901/jeab.2005.80-04>
- 74 Frick, K. M., & Berger-Sweeney, J. (2001). Spatial reference memory and neocortical neurochemistry vary  
75 with the estrous cycle in C57BL/6 mice. *Behavioral Neuroscience*, 115(1).  
76 <https://doi.org/10.1037/0735-7044.115.1.229>

- 77 Frick, K. M., Burlingame, L. A., Arters, J. A., & Berger-Sweeney, J. (1999). Reference memory, anxiety and  
78 estrous cyclicity in c57bl/6nia mice are affected by age and sex.  
79 [www.elsevier.com/locate/neuroscience](http://www.elsevier.com/locate/neuroscience)
- 80 Frye, C. A. (1995). Estrus-associated decrements in a water maze task are limited to acquisition. *Physiology*  
81 *& Behavior*, 57(1). [https://doi.org/10.1016/0031-9384\(94\)00197-D](https://doi.org/10.1016/0031-9384(94)00197-D)
- 82 Frye, C. A., Duffy, C. K., & Walf, A. A. (2007). Estrogens and progestins enhance spatial learning of intact  
83 and ovariectomized rats in the object placement task. *Neurobiology of Learning and Memory*, 88(2).  
84 <https://doi.org/10.1016/j.nlm.2007.04.003>
- 85 Goldman, J. M., Murr, A. S., & Cooper, R. L. (2007). The rodent estrous cycle: Characterization of vaginal  
86 cytology and its utility in toxicological studies. In *Birth Defects Research Part B - Developmental and*  
87 *Reproductive Toxicology* (Vol. 80, Issue 2, pp. 84–97). <https://doi.org/10.1002/bdrb.20106>
- 88 Gruene, T. M., Flick, K., Stefano, A., Shea, S. D., & Shansky, R. M. (2015). Sexually divergent expression of  
89 active and passive conditioned fear responses in rats. *ELife*, 4. <https://doi.org/10.7554/eLife.11352>
- 90 Hamson, D. K., Roes, M. M., & Galea, L. A. M. (2016). Sex Hormones and Cognition: Neuroendocrine  
91 Influences on Memory and Learning. In *Comprehensive Physiology* (Vol. 6, Issue 3, pp. 1295–1337).  
92 <https://doi.org/10.1002/cphy.c150031>
- 93 Healy, S. D., Braham, S. R., & Braithwaite, V. A. (1999). Spatial working memory in rats: no differences  
94 between the sexes. *Proceedings of the Royal Society of London. Series B: Biological Sciences*,  
95 266(1435). <https://doi.org/10.1098/rspb.1999.0923>
- 96 Jayachandran, M., Linley, S. B., Schlecht, M., Mahler, S. v., Vertes, R. P., & Allen, T. A. (2019). Prefrontal  
97 Pathways Provide Top-Down Control of Memory for Sequences of Events. *Cell Reports*, 28(3), 640-  
98 654.e6. <https://doi.org/10.1016/j.celrep.2019.06.053>
- 99 Jonasson, Z. (2005). Meta-analysis of sex differences in rodent models of learning and memory: a review of  
00 behavioral and biological data. *Neuroscience & Biobehavioral Reviews*, 28(8).  
01 <https://doi.org/10.1016/j.neubiorev.2004.10.006>

- 02 Kessler, R. C., Berglund, P., Demler, O., Jin, R., Merikangas, K. R., & Walters, E. E. (2005). Lifetime  
03 Prevalence and Age-of-Onset Distributions of DSM-IV Disorders in the National Comorbidity Survey  
04 Replication. *Archives of General Psychiatry*, 62(6). <https://doi.org/10.1001/archpsyc.62.6.593>
- 05 Korol, D. L. (2004). Role of estrogen in balancing contributions from multiple memory systems.  
06 *Neurobiology of Learning and Memory*, 82(3). <https://doi.org/10.1016/j.nlm.2004.07.006>
- 07 Korol, D. L., & Kolo, L. L. (2002). Estrogen-induced changes in place and response learning in young adult  
08 female rats. *Behavioral Neuroscience*, 116(3). <https://doi.org/10.1037/0735-7044.116.3.411>
- 09 Koss, W. A., & Frick, K. M. (2017). Sex differences in hippocampal function. In *Journal of Neuroscience*  
10 *Research* (Vol. 95, Issues 1–2, pp. 539–562). John Wiley and Sons Inc.  
11 <https://doi.org/10.1002/jnr.23864>
- 12 Lamberty, Y., & Gower, A. J. (1988). Investigation into sex-related differences in locomotor activity, place  
13 learning and passive avoidance responding in NMRI mice. *Physiology & Behavior*, 44(6).  
14 [https://doi.org/10.1016/0031-9384\(88\)90063-7](https://doi.org/10.1016/0031-9384(88)90063-7)
- 15 Launer, J. (1999). Narrative based medicine: A narrative approach to mental health in general practice.  
16 *BMJ*, 318(7176). <https://doi.org/10.1136/bmj.318.7176.117>
- 17 Levy, L. J., Astur, R. S., & Frick, K. M. (2005). Men and Women Differ in Object Memory but Not  
18 Performance of a Virtual Radial Maze. *Behavioral Neuroscience*, 119(4).  
19 <https://doi.org/10.1037/0735-7044.119.4.853>
- 20 Luine, V., Gomez, J., Beck, K., & Bowman, R. (2017). Sex differences in chronic stress effects on cognition  
21 in rodents. *Pharmacology Biochemistry and Behavior*, 152, 13–19.  
22 <https://doi.org/10.1016/j.pbb.2016.08.005>
- 23 McCarthy, M. M., & Konkle, A. T. M. (2005). When is a sex difference not a sex difference? *Frontiers in*  
24 *Neuroendocrinology*, 26(2). <https://doi.org/10.1016/j.yfrne.2005.06.001>
- 25 McEwen, B. S., & Milner, T. A. (2017). Understanding the broad influence of sex hormones and sex  
26 differences in the brain. *Journal of Neuroscience Research*, 95(1–2).  
27 <https://doi.org/10.1002/jnr.23809>

- 28 Nowak, N. T., Diamond, M. P., Land, S. J., & Moffat, S. D. (2014). Contributions of sex, testosterone, and  
29 androgen receptor CAG repeat number to virtual Morris water maze performance.  
30 *Psychoneuroendocrinology*, 41. <https://doi.org/10.1016/j.psyneuen.2013.12.003>
- 31 Paris, J. J., & Frye, C. A. (2008). Estrous cycle, pregnancy, and parity enhance performance of rats in object  
32 recognition or object placement tasks. *Reproduction*, 136(1). <https://doi.org/10.1530/REP-07-0512>
- 33 Perrot-Sinal, T. S., Kostenuik, M. A., Ossenkopp, K.-P., & Kavaliers, M. (1996). Sex differences in  
34 performance in the Morris water maze and the effects of initial nonstationary hidden platform training.  
35 *Behavioral Neuroscience*, 110(6). <https://doi.org/10.1037/0735-7044.110.6.1309>
- 36 Pigott, T. A. (2003). Anxiety disorders in women. *Psychiatric Clinics of North America*, 26(3).  
37 [https://doi.org/10.1016/S0193-953X\(03\)00040-6](https://doi.org/10.1016/S0193-953X(03)00040-6)
- 38 Pompili, A., Tomaz, C., Arnone, B., Tavares, M. C., & Gasbarri, A. (2010). Working and reference memory  
39 across the estrous cycle of rat: A long-term study in gonadally intact females. *Behavioural Brain*  
40 *Research*, 213(1). <https://doi.org/10.1016/j.bbr.2010.04.018>
- 41 Prendergast, B. J., Onishi, K. G., & Zucker, I. (2014). Female mice liberated for inclusion in neuroscience  
42 and biomedical research. *Neuroscience & Biobehavioral Reviews*, 40.  
43 <https://doi.org/10.1016/j.neubiorev.2014.01.001>
- 44 Reeders, P. C., Hamm, A. G., Allen, T. A., & Mattfeld, A. T. (2021). Medial prefrontal cortex and  
45 hippocampal activity differentially contribute to ordinal and temporal context retrieval during  
46 sequence memory. *Learning & Memory*, 28(4). <https://doi.org/10.1101/lm.052365.120>
- 47 Roof, R. L., Zhang, Q., Glasier, M. M., & Stein, D. G. (1993). Gender-specific impairment on Morris water  
48 maze task after entorhinal cortex lesion. *Behavioural Brain Research*, 57(1).  
49 [https://doi.org/10.1016/0166-4328\(93\)90060-4](https://doi.org/10.1016/0166-4328(93)90060-4)
- 50 Roof, R., & Stein, D. (1999). Gender differences in Morris water maze performance depend on task  
51 parameters. *Physiology & Behavior*, 68(1–2). [https://doi.org/10.1016/S0031-9384\(99\)00162-6](https://doi.org/10.1016/S0031-9384(99)00162-6)
- 52 Saucier, D., & Cain, D. P. (1995). Spatial learning without NMDA receptor-dependent long-term potentiation.  
53 *Nature*, 378(6553). <https://doi.org/10.1038/378186a0>

- 54 Saucier, D. M., Shultz, S. R., Keller, A. J., Cook, C. M., & Binsted, G. (2008). Sex differences in object  
55 location memory and spatial navigation in Long-Evans rats. *Animal Cognition*, 11(1), 129–137.  
56 <https://doi.org/10.1007/s10071-007-0096-1>
- 57 Schmidt, B., Jacobson, T. K., & Markus, E. (2009). Hippocampal and striatal dependent navigation: Sex  
58 differences are limited to acquisition. *Hormones and Behavior*, 56(2), 199–205.  
59 <https://doi.org/10.1016/j.yhbeh.2009.04.004>
- 60 Seymoure, P., Dou, H., & Juraska, J. M. (1996). Sex differences in radial maze performance: Influence of  
61 rearing environment and room cues. In *Psychobiology* (Vol. 24, Issue 1).  
62 <https://doi.org/10.3758/BF03331950>
- 63 Sherry, D. F., & Hampson, E. (1997). Evolution and the hormonal control of sexually-dimorphic spatial  
64 abilities in humans. *Trends in Cognitive Sciences*, 1(2). [https://doi.org/10.1016/S1364-](https://doi.org/10.1016/S1364-6613(97)01015-2)  
65 [6613\(97\)01015-2](https://doi.org/10.1016/S1364-6613(97)01015-2)
- 66 Sokal, Robert. R., & Rohlf, J. F. (1995). *Biometry: The principles and practice of statistics in Biological*  
67 *Research* (Vol. 2nd). Freeman.
- 68 Spritzer, M. D., Gill, M., Weinberg, A., & Galea, L. A. M. (2008). Castration Differentially Affects Spatial  
69 Working and Reference Memory in Male Rats. *Archives of Sexual Behavior*, 37(1).  
70 <https://doi.org/10.1007/s10508-007-9264-2>
- 71 Stackman, R. W., Blasberg, M. E., Langan, C. J., & Clark, A. S. (1997). Stability of Spatial Working Memory  
72 across the Estrous Cycle of Long–Evans Rats. *Neurobiology of Learning and Memory*, 67(2).  
73 <https://doi.org/10.1006/nlme.1996.3753>
- 74 Steimer, T., & Driscoll, P. (2005). Inter-individual vs line/strain differences in psychogenetically selected  
75 Roman High-(RHA) and Low-(RLA) Avoidance rats: Neuroendocrine and behavioural aspects. In  
76 *Neuroscience and Biobehavioral Reviews* (Vol. 29, Issue 1 SPEC. ISS., pp. 99–112). Elsevier Ltd.  
77 <https://doi.org/10.1016/j.neubiorev.2004.07.002>
- 78 Sutcliffe, J. S., Marshall, K. M., & Neill, J. C. (2007). Influence of gender on working and spatial memory in  
79 the novel object recognition task in the rat. *Behavioural Brain Research*, 177(1).  
80 <https://doi.org/10.1016/j.bbr.2006.10.029>

- 81 Tulving, E. (2002). Episodic Memory: From Mind to Brain. *Annual Review of Psychology*, 53(1).  
82 <https://doi.org/10.1146/annurev.psych.53.100901.135114>
- 83 van Goethem, N. P., Rutten, K., van der Staay, F. J., Jans, L. A. W., Akkerman, S., Steinbusch, H. W. M.,  
84 Blokland, A., van't Klooster, J., & Prickaerts, J. (2012). Object recognition testing: Rodent species,  
85 strains, housing conditions, and estrous cycle. *Behavioural Brain Research*, 232(2).  
86 <https://doi.org/10.1016/j.bbr.2012.03.023>
- 87 Veng, L. M., Granholm, A.-C., & Rose, G. M. (2003). Age-related sex differences in spatial learning and  
88 basal forebrain cholinergic neurons in F344 rats. *Physiology & Behavior*, 80(1).  
89 [https://doi.org/10.1016/S0031-9384\(03\)00219-1](https://doi.org/10.1016/S0031-9384(03)00219-1)
- 90 Walf, A. A., & Frye, C. A. (2006). A Review and Update of Mechanisms of Estrogen in the Hippocampus and  
91 Amygdala for Anxiety and Depression Behavior. *Neuropsychopharmacology*, 31(6).  
92 <https://doi.org/10.1038/sj.npp.1301067>
- 93 Warren, S. G., & Juraska, J. M. (1997). Spatial and nonspatial learning across the rat estrous cycle.  
94 *Behavioral Neuroscience*, 111(2). <https://doi.org/10.1037/0735-7044.111.2.259>
- 95 Williams, C. L., Barnett, A. M., & Meck, W. H. (1990). Organizational effects of early gonadal secretions on  
96 sexual differentiation in spatial memory. *Behavioral Neuroscience*, 104(1).  
97 <https://doi.org/10.1037/0735-7044.104.1.84>
- 98 Woolley, D. G., Vermaercke, B., de Beeck, H. O., Wagemans, J., Gantois, I., D'Hooge, R., Swinnen, S. P.,  
99 & Wenderoth, N. (2010). Sex differences in human virtual water maze performance: Novel measures  
00 reveal the relative contribution of directional responding and spatial knowledge. *Behavioural Brain*  
01 *Research*, 208(2), 408–414. <https://doi.org/10.1016/j.bbr.2009.12.019>
- 02 Zurkovsky, L., Brown, S. L., Boyd, S. E., Fell, J. A., & Korol, D. L. (2007). Estrogen modulates learning in  
03 female rats by acting directly at distinct memory systems. *Neuroscience*, 144(1), 26–37.  
04 <https://doi.org/10.1016/j.neuroscience.2006.09.002>  
05  
06
